# Supplementary material for: Technology anxiety and resistance to change behavioral study of a wearable cardiac warming system using an extended TAM for older adults
Source: PubMed Central journal article supplement (PMC6957166; doi:10.1371/journal.pone.0227270), 2020-01-13
Supplement: pone.0227270.s001.pdf [file pone.0227270.s001.pdf]

Researcher:

Date:

### Section One: Background Information

[1] Gender  Male  Female

[2] Age: \_\_\_\_\_ years old

[3] Educational Level:

Elementary School  Junior High  Senior High  Bachelor's Degree

Graduate Degree

### Section Two: TAM Questionnaire

|     |                                                                                       | Strongly disagree | Disagree | Neutral | Agree | Strongly Agree |
|-----|---------------------------------------------------------------------------------------|-------------------|----------|---------|-------|----------------|
| RC1 | I don't want the smart clothing to change the way I deal with health-related problems | 1                 | 2        | 3       | 4     | 5              |
| RC2 | I don't want the smart clothing to change the way I keep myself healthy.              | 1                 | 2        | 3       | 4     | 5              |
| RC3 | I don't want the smart clothing to change the way I interact with other people.       | 1                 | 2        | 3       | 4     | 5              |
| RC4 | Overall, I don't want the smart clothing to change the way I currently live.          | 1                 | 2        | 3       | 4     | 5              |
| TA1 | I feel apprehensive about using smart clothes.                                        | 1                 | 2        | 3       | 4     | 5              |
| TA2 | I hesitate to use technology for fear of making mistakes I cannot correct.            | 1                 | 2        | 3       | 4     | 5              |
| TA3 | I am afraid that the equipment may suddenly stop functioning.                         | 1                 | 2        | 3       | 4     | 5              |
| TA4 | I don't want other people to see me wearing the smart clothing.                       | 1                 | 2        | 3       | 4     | 5              |
| PB1 | The smart clothing system provides healthcare information anytime and anywhere.       | 1                 | 2        | 3       | 4     | 5              |

|       |                                                                                                 |   |   |   |   |   |
|-------|-------------------------------------------------------------------------------------------------|---|---|---|---|---|
| PB2   | The smart clothing system provides me with anytime-and-anywhere communication and connectivity. | 1 | 2 | 3 | 4 | 5 |
| PB3   | I will use the smart clothing system very often for health purposes.                            | 1 | 2 | 3 | 4 | 5 |
| PEOU1 | I find the smart clothing to be clear and understandable.                                       | 1 | 2 | 3 | 4 | 5 |
| PEOU2 | I find that the smart clothing does not require a lot of mental effort.                         | 1 | 2 | 3 | 4 | 5 |
| PEOU3 | I find the smart clothing to be easy to use.                                                    | 1 | 2 | 3 | 4 | 5 |
| PU1   | Using the smart clothing will improve my quality of life.                                       | 1 | 2 | 3 | 4 | 5 |
| PU2   | Using the smart clothing will make my life more convenient.                                     | 1 | 2 | 3 | 4 | 5 |
| PU3   | Using the smart clothing will make me more effective in my life.                                | 1 | 2 | 3 | 4 | 5 |
| PU4   | Overall, I find the smart clothing to be useful in my life.                                     | 1 | 2 | 3 | 4 | 5 |
| AT1   | I think that using the smart clothing is a good idea.                                           | 1 | 2 | 3 | 4 | 5 |
| AT2   | I think that using the smart clothing is beneficial to me.                                      | 1 | 2 | 3 | 4 | 5 |
| AT3   | I have a positive perception of using the smart clothing.                                       | 1 | 2 | 3 | 4 | 5 |
| BI1   | I intend to use the smart clothing in the future.                                               | 1 | 2 | 3 | 4 | 5 |
| BI2   | I will always try to use the smart clothing in my daily life.                                   | 1 | 2 | 3 | 4 | 5 |
| BI3   | I plan to use the smart clothing frequently.                                                    | 1 | 2 | 3 | 4 | 5 |
